# Supplementary material
Source: MDPI journal article supplement (https://www.mdpi.com/2673-7426/3/4/67)
Supplement: s1 [file s1]

**Table S1 - Characteristics of the questionnaires**

---

|                                                                                                                                                                                                                                                                                                                                                                                                                                                                    |
|--------------------------------------------------------------------------------------------------------------------------------------------------------------------------------------------------------------------------------------------------------------------------------------------------------------------------------------------------------------------------------------------------------------------------------------------------------------------|
| <b>Timeline follow-back (TLFB)</b><br>Self-reported substance use (quantity and frequency) in the last week;<br><i>Alcohol:</i><br>Test-retest reliability: 0.79-0.92;<br>Correlation with the Alcohol Dependence Scale ( $r=0.53$ for heavy consumption days, and $r=-0.38$ for low consumption days).<br><i>Cannabis:</i><br>Test-retest reliability ranges from 0.73 to 0.97.                                                                                   |
| <b>Cannabis Use Problems Identification Test (CUPIT)</b><br>Self-report screen to expedite detection of currently and potentially problematic cannabis use;<br>16-item (score range from 3 to 82);<br>Test-retest: 0.89–0.99;<br>Internal consistency reliability: 0.92, 0.83;<br>Highly significant ability to discriminate diagnostic subgroups along the severity continuum (non-problematic, risky ( $>12$ ), problematic use( $>20$ )).                       |
| <b>Marijuana Ladder</b><br>Measure of motivation to change marijuana use;<br>Diagram of a ladder with 10 “rungs,” several of which are anchored by verbal labels of different degrees of readiness to change (pre-contemplation, contemplation, preparation, action, maintenance).                                                                                                                                                                                 |
| <b>Scale of anxiety evaluation in schizophrenia (SAES)</b><br>Evaluates the anxiety in the past week in persons affected with schizophrenia;<br>18-item on a 4-points scale ranging from “none” to “severe”: Score range from 0 to 72;<br>Internal consistency: ( $\alpha=0.71 - 0.89$ across factors);<br>Inter-rater reliability: (ICC=0.82).                                                                                                                    |
| <b>Calgary depression scale of schizophrenia (CDSS)</b><br>Assess the level of depression in schizophrenia;<br>9-item on a 4-points scale ranging from “none” to “severe”: Score range from 0 to 27;<br><6 has 82% specificity and 85% sensitivity for predicting presence of a major depressive episode<br>Internal consistency: 0.83<br>Internal reliability: 0.84                                                                                               |
| <b>Quality of Life Enjoyment and Satisfaction Questionnaire – Short Form (QLESQ-SF)</b><br>Self-report scale measuring enjoyment and satisfaction experienced during the past week in various areas of daily functioning (e.g., mood, hobbies, relationships with others);<br>16-item on a 5 -point scales ranging from “very unsatisfied” to “strongly satisfied”.<br>Score range from 16 to 80;<br>Internal consistency: 0.9;<br>Test-retest coefficients: 0.93. |

---
